# Supplementary material for: protGear: A protein microarray data pre-processing suite
Source: PubMed Central journal article supplement (PMC8114118; doi:10.1016/j.csbj.2021.04.044), 2021-04-24
Supplement: mmc4.pdf [file mmc4.pdf]

| Comparison between currently available protein microarray analysis tools |                                                                                          |                                                                                                                                           |                                                                                                                                         |                                                                       |                                                                                                                                             |                                                                                                                                         |                                                                                 |
|--------------------------------------------------------------------------|------------------------------------------------------------------------------------------|-------------------------------------------------------------------------------------------------------------------------------------------|-----------------------------------------------------------------------------------------------------------------------------------------|-----------------------------------------------------------------------|---------------------------------------------------------------------------------------------------------------------------------------------|-----------------------------------------------------------------------------------------------------------------------------------------|---------------------------------------------------------------------------------|
|                                                                          | protGear                                                                                 | Protein Microarray Analyser (PMA)                                                                                                         | Protein Array Analyzer (PAA)                                                                                                            | protein array web exploreR (PAWER)                                    | RPPanalyzer                                                                                                                                 | RPPASPACE                                                                                                                               | protein microarray database (PMD)                                               |
| Language                                                                 | R and Shiny                                                                              | Java.                                                                                                                                     | R                                                                                                                                       | R and JavaScript                                                      | R                                                                                                                                           | R                                                                                                                                       | Php and R                                                                       |
| Source code contribution                                                 | ✓                                                                                        | X                                                                                                                                         | X                                                                                                                                       | ✓                                                                     | ✓                                                                                                                                           | ✓                                                                                                                                       | X                                                                               |
| Vignettes: long-form documentation                                       | ✓                                                                                        | X                                                                                                                                         | ✓                                                                                                                                       | X                                                                     | X                                                                                                                                           | ✓                                                                                                                                       | X                                                                               |
| Interactive GUI                                                          | ✓                                                                                        | ✓                                                                                                                                         | X                                                                                                                                       | ✓                                                                     | X                                                                                                                                           | X                                                                                                                                       | ✓                                                                               |
| Multiple methods comparison                                              | ✓                                                                                        | X                                                                                                                                         | X                                                                                                                                       | X                                                                     | X                                                                                                                                           | X                                                                                                                                       | X                                                                               |
| Background corection                                                     | Local and Global Background, moving minimum, half moving minimum, normexp and log linear | Local Background Subtraction                                                                                                              | Not specified                                                                                                                           | Local Background Subtraction                                          | Limma background correct and admin                                                                                                          | Local background subtraction                                                                                                            | Not Clear                                                                       |
| Normalization                                                            | Log, RLM, VSN and Cycli Loess                                                            | Pin to Pin and Array to Array Normalization                                                                                               | RLM                                                                                                                                     | RLM                                                                   | proteinDye,row, housekeeping and extValue                                                                                                   | spatial corrections                                                                                                                     | Not Clear                                                                       |
| Downstream Analysis                                                      | ✓                                                                                        | X                                                                                                                                         | ✓                                                                                                                                       | X                                                                     | X                                                                                                                                           | X                                                                                                                                       | ✓                                                                               |
| Accessibility                                                            | ✓                                                                                        | <a href="https://sourceforge.net/projects/protein-microarray-analyser/">https://sourceforge.net/projects/protein-microarray-analyser/</a> | <a href="https://bioconductor.org/packages/release/bioc/html/PAA.html">https://bioconductor.org/packages/release/bioc/html/PAA.html</a> | <a href="https://bit.cs.ut.ee/pawer/">https://bit.cs.ut.ee/pawer/</a> | <a href="https://cran.r-project.org/web/packages/RPPanalyzer/index.html">https://cran.r-project.org/web/packages/RPPanalyzer/index.html</a> | <a href="https://cran.r-project.org/web/packages/RPPASPACE/index.html">https://cran.r-project.org/web/packages/RPPASPACE/index.html</a> | <a href="http://www.proteinmicroarray.cn/">http://www.proteinmicroarray.cn/</a> |
| License                                                                  | GPL-3                                                                                    | No License Specified                                                                                                                      | 3-Clause BSD License                                                                                                                    | GNU GPL v2 license                                                    | LGPL-3                                                                                                                                      | Artistic License 2.0                                                                                                                    | Creative Commons Attribution 4.0 International                                  |
| Last updated                                                             | 2021                                                                                     | 2018                                                                                                                                      | 2020                                                                                                                                    | 2020                                                                  | 2020                                                                                                                                        | 2020                                                                                                                                    | 2021                                                                            |
